# Supplementary material
Source: publisher figshare collection journal article supplement (https://sage.figshare.com/ndownloader/files/14230337)
Supplement: Supplementary file 1 [file 14230337]

## Experiment 1: MLN T-cell flow cytometry data extraction (FlowJ

### Day 1 post treatment - Frequency of parent (FOP) (%):

| Group and termination time point | Animal ID | Tissue | TCRab+ T cells <sup>2</sup><br>(total count) | TCRab+ T cells <sup>2</sup><br>(FOP %) |
|----------------------------------|-----------|--------|----------------------------------------------|----------------------------------------|
| Controls, day 1 post treatment   | 2         | MLN    | 78575                                        | 79.40%                                 |
|                                  | 4         | MLN    | 64702                                        | 74.90%                                 |
|                                  | 14        | MLN    | 248241                                       | 75.00%                                 |
|                                  | 21        | MLN    | 398472                                       | 80.30%                                 |
|                                  | 27        | MLN    | 53368                                        | 82.10%                                 |
|                                  | 31        | MLN    | 67140                                        | 83.10%                                 |
|                                  | 32        | MLN    | 50467                                        | 78.70%                                 |
|                                  | 41        | MLN    | 192430                                       | 78.30%                                 |
| 1,5% DSS, day 1 post treatment   | 7         | MLN    | 129957                                       | 72.90%                                 |
|                                  | 9         | MLN    | 124977                                       | 75.40%                                 |
|                                  | 16        | MLN    | 205474                                       | 79.00%                                 |
|                                  | 19        | MLN    | 129960                                       | 78.00%                                 |
|                                  | 28        | MLN    | 12114                                        | 71.50%                                 |
|                                  | 30        | MLN    | 150535                                       | 71.30%                                 |
|                                  | 35        | MLN    | 160371                                       | 76.00%                                 |
| 4% DSS, day 1 post treatment     | 34        | MLN    | 48933                                        | 74.20%                                 |
|                                  | 37        | MLN    | 57710                                        | 77.50%                                 |
|                                  | 42        | MLN    | 72527                                        | 79.80%                                 |

Columns used in data analysis:

### Day 25 post treatment - Frequency of parent (FOP) (%):

| Group and termination time point | Animal ID | Tissue | TCRab+ T cells <sup>2</sup><br>(total count) | TCRab+ T cells <sup>2</sup><br>(FOP %) |
|----------------------------------|-----------|--------|----------------------------------------------|----------------------------------------|
| Controls, day 1 post treatment   | 8         | MLN    | 203004                                       | 80.10%                                 |
|                                  | 11        | MLN    | 201140                                       | 74.10%                                 |
|                                  | 12        | MLN    | 220649                                       | 74.60%                                 |
|                                  | 17        | MLN    | 277060                                       | 70.40%                                 |
|                                  | 18        | MLN    | 169524                                       | 72.10%                                 |
|                                  | 22        | MLN    | 178424                                       | 75.50%                                 |
|                                  | 26        | MLN    | 144502                                       | 71.60%                                 |
|                                  | 45        | MLN    | 270838                                       | 75.70%                                 |
| 1,5% DSS, day 1 post treatment   | 10        | MLN    | 182558                                       | 74.80%                                 |
|                                  | 15        | MLN    | 252374                                       | 72.90%                                 |
|                                  | 20        | MLN    | 143116                                       | 76.20%                                 |
|                                  | 23        | MLN    | 172407                                       | 75.50%                                 |
|                                  | 33        | MLN    | 255625                                       | 69.80%                                 |
|                                  | 38        | MLN    | 119263                                       | 76.90%                                 |
|                                  | 43        | MLN    | 306444                                       | 76.20%                                 |
|                                  | 46        | MLN    | 189969                                       | 76.10%                                 |
| 4% DSS, day 1 post treatment     | 5         | MLN    | 54953                                        | 76.10%                                 |
|                                  | 24        | MLN    | 347386                                       | 70.20%                                 |
|                                  | 29        | MLN    | 271761                                       | 71.50%                                 |
|                                  | 36        | MLN    | 65982                                        | 66.60%                                 |
|                                  | 39        | MLN    | 191837                                       | 71.80%                                 |
|                                  | 40        | MLN    | 303466                                       | 71.50%                                 |

Columns used in data analysis:

lo v10)

| SP CD4+ (TCRab+) T cells? | SP CD4+ (TCRab+) T cells? |
|---------------------------|---------------------------|
| (total count)             | (FOP %)                   |
| 55863                     | 71.10%                    |
| 48132                     | 74.40%                    |
| 184363                    | 74.30%                    |
| 289316                    | 72.60%                    |
| 40615                     | 76.10%                    |
| 48004                     | 71.50%                    |
| 37558                     | 74.40%                    |
| 141100                    | 73.30%                    |
| 93467                     | 71.90%                    |
| 91638                     | 73.30%                    |
| 151458                    | 73.70%                    |
| 94822                     | 73.00%                    |
| 9540                      | 78.80%                    |
| 119598                    | 79.40%                    |
| 117868                    | 73.50%                    |
| 37085                     | 75.80%                    |
| 42535                     | 73.70%                    |
| 53528                     | 73.80%                    |

CD4+ T cells in TCRab+ cells day 1 PT

| SP CD4+ (TCRab+) T cells? | SP CD4+ (TCRab+) T cells? |
|---------------------------|---------------------------|
| (total count)             | (FOP %)                   |
| 150607                    | 74.20%                    |
| 149763                    | 74.50%                    |
| 163279                    | 74.00%                    |
| 208202                    | 75.10%                    |
| 126616                    | 74.70%                    |
| 133619                    | 74.90%                    |
| 108297                    | 74.90%                    |
| 200908                    | 74.20%                    |
| 136278                    | 74.60%                    |
| 191227                    | 75.80%                    |
| 107155                    | 74.90%                    |
| 128770                    | 74.70%                    |
| 191591                    | 75.00%                    |
| 88883                     | 74.50%                    |
| 225600                    | 73.60%                    |
| 142054                    | 74.80%                    |
| 40962                     | 74.50%                    |
| 255445                    | 73.50%                    |
| 203366                    | 74.80%                    |
| 50478                     | 76.50%                    |
| 141195                    | 73.60%                    |
| 222620                    | 73.40%                    |

CD4+ T cells in TCRab+ cells day 25 PT

| SP CD4+ (TCRab+) T cells CD25+ CD44+ <sup>?</sup> | SP CD4+ (TCRab+) T cells CD103+ <sup>?</sup> |
|---------------------------------------------------|----------------------------------------------|
| (FOP %)                                           | (FOP %)                                      |
| 48.40%                                            | 1.84%                                        |
| 49.00%                                            | 2.09%                                        |
| 49.10%                                            | 2.10%                                        |
| 49.30%                                            | 2.45%                                        |
| 48.70%                                            | 2.16%                                        |
| 45.20%                                            | 1.54%                                        |
| 47.00%                                            | 1.60%                                        |
| 56.40%                                            | 1.96%                                        |
| 50.50%                                            | 2.43%                                        |
| 54.00%                                            | 2.81%                                        |
| 57.50%                                            | 2.47%                                        |
| 52.90%                                            | 2.41%                                        |
| 53.10%                                            | 1.98%                                        |
| 54.10%                                            | 2.09%                                        |
| 54.00%                                            | 2.31%                                        |
| 54.60%                                            | 2.25%                                        |
| 55.60%                                            | 2.05%                                        |
| 55.10%                                            | 1.77%                                        |

CD25+ CD44+ in CD4+ T cells day 1 PT      CD103+ in CD4+ T cells day 1 PT

| SP CD4+ (TCRab+) T cells CD25+ CD44+ <sup>?</sup> | SP CD4+ (TCRab+) T cells CD103+ <sup>?</sup> |
|---------------------------------------------------|----------------------------------------------|
| (FOP %)                                           | (FOP %)                                      |
| 21.00%                                            | 2.57%                                        |
| 21.80%                                            | 2.71%                                        |
| 21.10%                                            | 3.05%                                        |
| 24.00%                                            | 2.67%                                        |
| 22.70%                                            | 2.83%                                        |
| 21.90%                                            | 2.64%                                        |
| 22.40%                                            | 2.68%                                        |
| 21.60%                                            | 2.44%                                        |
| 22.30%                                            | 2.79%                                        |
| 22.80%                                            | 3.25%                                        |
| 21.30%                                            | 2.68%                                        |
| 22.20%                                            | 2.67%                                        |
| 23.60%                                            | 2.78%                                        |
| 21.40%                                            | 2.36%                                        |
| 18.70%                                            | 2.27%                                        |
| 21.80%                                            | 2.45%                                        |
| 23.10%                                            | 2.82%                                        |
| 18.60%                                            | 2.47%                                        |
| 24.60%                                            | 2.95%                                        |
| 24.10%                                            | 2.64%                                        |
| 23.90%                                            | 2.66%                                        |
| 26.70%                                            | 3.34%                                        |

CD25+ CD44+ in CD4+ T cells day 25 PT      CD103+ in CD4+ T cells day 25 PT

| SP CD4+ (TCRab+) CD103+ T reg cells (FoxP3+CD25+)<br>(FOP %) | SP CD4+ (TCRab+) T cells CD218a+<br>(FOP %) |
|--------------------------------------------------------------|---------------------------------------------|
| 72.60%                                                       | 1.27%                                       |
| 66.70%                                                       | 1.78%                                       |
| 74.80%                                                       | 1.90%                                       |
| 70.70%                                                       | 1.73%                                       |
| 72.10%                                                       | 2.07%                                       |
| 71.20%                                                       | 1.11%                                       |
| 71.90%                                                       | 1.09%                                       |
| 80.70%                                                       | 2.21%                                       |
| 74.40%                                                       | 1.85%                                       |
| 72.70%                                                       | 2.32%                                       |
| 75.60%                                                       | 2.11%                                       |
| 71.80%                                                       | 2.43%                                       |
| 86.80%                                                       | 1.40%                                       |
| 79.70%                                                       | 1.52%                                       |
| 81.30%                                                       | 1.84%                                       |
| 80.50%                                                       | 1.73%                                       |
| 79.50%                                                       | 1.91%                                       |
| 82.30%                                                       | 1.79%                                       |

Treg (Foxp3+ CD25+) in CD103+ CD4+ T cells day 1 PT

CD218a+ in CD4+ T cells day 1 PT

| SP CD4+ (TCRab+) CD103+ T reg cells (FoxP3+CD25+)<br>(FOP %) | SP CD4+ (TCRab+) T cells CD218a+<br>(FOP %) |
|--------------------------------------------------------------|---------------------------------------------|
| 90.10%                                                       | 1.86%                                       |
| 89.70%                                                       | 1.95%                                       |
| 89.00%                                                       | 2.18%                                       |
| 90.60%                                                       | 2.71%                                       |
| 89.40%                                                       | 2.39%                                       |
| 87.90%                                                       | 2.00%                                       |
| 88.70%                                                       | 2.32%                                       |
| 89.10%                                                       | 2.04%                                       |
| 92.10%                                                       | 2.13%                                       |
| 89.40%                                                       | 2.02%                                       |
| 87.60%                                                       | 2.00%                                       |
| 89.00%                                                       | 2.16%                                       |
| 90.10%                                                       | 2.29%                                       |
| 88.00%                                                       | 2.30%                                       |
| 88.70%                                                       | 1.45%                                       |
| 90.10%                                                       | 1.96%                                       |
| 89.90%                                                       | 2.14%                                       |
| 85.80%                                                       | 1.83%                                       |
| 87.90%                                                       | 2.69%                                       |
| 87.70%                                                       | 2.74%                                       |
| 90.30%                                                       | 2.96%                                       |
| 91.70%                                                       | 3.86%                                       |

Treg (Foxp3+ CD25+) in CD103+ CD4+ T cells day 25 PT

CD218a+ in CD4+ T cells day 25 PT

| SP CD4+ (TCRab+) T cells CD314+<br>(FOP %) | Treg cells (FoxP3+ CD25+) <sup>2</sup><br>(total count) |
|--------------------------------------------|---------------------------------------------------------|
| 0.05%                                      | 3871                                                    |
| 0.04%                                      | 3324                                                    |
| 0.03%                                      | 14500                                                   |
| 0.05%                                      | 20261                                                   |
| 0.07%                                      | 2765                                                    |
| 0.04%                                      | 2485                                                    |
| 0.01%                                      | 2276                                                    |
| 0.08%                                      | 12256                                                   |
| 0.05%                                      | 7219                                                    |
| 0.04%                                      | 7350                                                    |
| 0.06%                                      | 13156                                                   |
| 0.04%                                      | 7642                                                    |
| 0.14%                                      | 784                                                     |
| 0.12%                                      | 10190                                                   |
| 0.16%                                      | 11384                                                   |
| 0.37%                                      | 3410                                                    |
| 0.06%                                      | 3755                                                    |
| 0.12%                                      | 4433                                                    |

CD314+ in CD4+ T cells day 1 PT

| SP CD4+ (TCRab+) T cells CD314+<br>(FOP %) | Treg cells (FoxP3+ CD25+) <sup>2</sup><br>(total count) |
|--------------------------------------------|---------------------------------------------------------|
| 0.17%                                      | 17275                                                   |
| 0.26%                                      | 18225                                                   |
| 0.18%                                      | 19529                                                   |
| 0.14%                                      | 25778                                                   |
| 0.22%                                      | 15503                                                   |
| 0.30%                                      | 15899                                                   |
| 0.28%                                      | 13035                                                   |
| 0.18%                                      | 23108                                                   |
| 0.13%                                      | 16417                                                   |
| 0.24%                                      | 24662                                                   |
| 0.26%                                      | 12652                                                   |
| 0.26%                                      | 15591                                                   |
| 0.26%                                      | 24899                                                   |
| 0.14%                                      | 10088                                                   |
| 0.14%                                      | 23792                                                   |
| 0.17%                                      | 16752                                                   |
| 0.13%                                      | 5271                                                    |
| 0.18%                                      | 29003                                                   |
| 0.37%                                      | 25976                                                   |
| 0.33%                                      | 6224                                                    |
| 0.17%                                      | 15609                                                   |
| 0.14%                                      | 29697                                                   |

CD314+ in CD4+ T cells day 25 PT

| Treg cells (FoxP3+ CD25+) <sup>2</sup><br>(FOP %) | Treg cells (FoxP3+ CD25+) CD44+ <sup>2</sup><br>(FOP %) |
|---------------------------------------------------|---------------------------------------------------------|
| 6.93%                                             | 98.90%                                                  |
| 6.91%                                             | 98.70%                                                  |
| 7.86%                                             | 98.80%                                                  |
| 7.00%                                             | 99.20%                                                  |
| 6.81%                                             | 98.80%                                                  |
| 5.18%                                             | 98.60%                                                  |
| 6.06%                                             | 99.00%                                                  |
| 8.69%                                             | 98.60%                                                  |
| 7.72%                                             | 99.00%                                                  |
| 8.02%                                             | 99.00%                                                  |
| 8.69%                                             | 98.80%                                                  |
| 8.06%                                             | 99.00%                                                  |
| 8.22%                                             | 98.60%                                                  |
| 8.52%                                             | 98.50%                                                  |
| 9.66%                                             | 98.60%                                                  |
| 9.20%                                             | 98.40%                                                  |
| 8.83%                                             | 98.70%                                                  |
| 8.28%                                             | 98.60%                                                  |

FOP MLN Tregs (Foxp3+ CD25+) in CD4+ T-cells day 1 PT

CD44+ in Treg T cells day 1 PT

| Treg cells (FoxP3+ CD25+) <sup>2</sup><br>(FOP %) | Treg cells (FoxP3+ CD25+) CD44+ <sup>2</sup><br>(FOP %) |
|---------------------------------------------------|---------------------------------------------------------|
| 11.50%                                            | 90.00%                                                  |
| 12.20%                                            | 89.40%                                                  |
| 12.00%                                            | 88.50%                                                  |
| 12.40%                                            | 90.30%                                                  |
| 12.20%                                            | 89.70%                                                  |
| 11.90%                                            | 89.60%                                                  |
| 12.00%                                            | 90.40%                                                  |
| 11.50%                                            | 89.70%                                                  |
| 12.00%                                            | 90.60%                                                  |
| 12.90%                                            | 89.30%                                                  |
| 11.80%                                            | 89.60%                                                  |
| 12.10%                                            | 89.60%                                                  |
| 13.00%                                            | 90.00%                                                  |
| 11.30%                                            | 89.20%                                                  |
| 10.50%                                            | 87.80%                                                  |
| 11.80%                                            | 88.90%                                                  |
| 12.90%                                            | 91.40%                                                  |
| 11.40%                                            | 87.90%                                                  |
| 12.80%                                            | 90.70%                                                  |
| 12.30%                                            | 90.30%                                                  |
| 11.10%                                            | 91.90%                                                  |
| 13.30%                                            | 91.50%                                                  |

FOP MLN Tregs (Foxp3+ CD25+) in CD4+ T-cells day 25 PT

CD44+ in Treg T cells day 25 PT

| Treg cells (FoxP3+ CD25+) CD103+<br>(FOP %) | Treg cells (FoxP3+ CD25+) CD218a+<br>(FOP %) |
|---------------------------------------------|----------------------------------------------|
| 19.30%                                      | 2.82%                                        |
| 20.20%                                      | 4.87%                                        |
| 20.00%                                      | 3.44%                                        |
| 24.80%                                      | 3.19%                                        |
| 22.90%                                      | 4.99%                                        |
| 21.10%                                      | 3.46%                                        |
| 19.00%                                      | 3.38%                                        |
| 18.20%                                      | 3.80%                                        |
| 23.40%                                      | 5.50%                                        |
| 25.50%                                      | 5.46%                                        |
| 21.50%                                      | 3.94%                                        |
| 21.50%                                      | 5.27%                                        |
| 20.90%                                      | 2.68%                                        |
| 19.60%                                      | 3.22%                                        |
| 19.40%                                      | 2.94%                                        |
| 19.70%                                      | 3.67%                                        |
| 18.50%                                      | 3.70%                                        |
| 17.60%                                      | 3.68%                                        |

CD103+ in Treg T cells day 1 PT

CD218a+ in Treg T cells day 1 PT

| Treg cells (FoxP3+ CD25+) CD103+<br>(FOP %) | Treg cells (FoxP3+ CD25+) CD218a+<br>(FOP %) |
|---------------------------------------------|----------------------------------------------|
| 20.20%                                      | 3.14%                                        |
| 20.00%                                      | 3.27%                                        |
| 22.70%                                      | 3.39%                                        |
| 19.50%                                      | 3.98%                                        |
| 20.60%                                      | 3.82%                                        |
| 19.50%                                      | 3.11%                                        |
| 19.70%                                      | 3.81%                                        |
| 18.90%                                      | 2.78%                                        |
| 21.30%                                      | 3.61%                                        |
| 22.50%                                      | 2.76%                                        |
| 19.90%                                      | 3.13%                                        |
| 19.60%                                      | 3.12%                                        |
| 19.20%                                      | 3.00%                                        |
| 18.30%                                      | 3.52%                                        |
| 19.10%                                      | 2.50%                                        |
| 18.70%                                      | 2.97%                                        |
| 19.70%                                      | 3.04%                                        |
| 18.70%                                      | 2.74%                                        |
| 20.30%                                      | 3.80%                                        |
| 18.80%                                      | 4.16%                                        |
| 21.80%                                      | 5.60%                                        |
| 23.00%                                      | 5.30%                                        |

CD103+ in Treg T cells day 25 PT

CD218a+ in Treg T cells day 25 PT

| Treg cells (FoxP3+ CD25+) CD314+<br>(FOP %) | SP CD8+ (TCRab+) T cells<br>(total count) |
|---------------------------------------------|-------------------------------------------|
| 0.10%                                       | 22168                                     |
| 0.12%                                       | 16007                                     |
| 0.03%                                       | 62109                                     |
| 0.09%                                       | 106631                                    |
| 0.07%                                       | 12388                                     |
| 0.04%                                       | 18770                                     |
| 0.00%                                       | 12615                                     |
| 0.05%                                       | 50089                                     |
| 0.10%                                       | 35553                                     |
| 0.00%                                       | 32366                                     |
| 0.08%                                       | 52514                                     |
| 0.00%                                       | 34170                                     |
| 0.13%                                       | 2463                                      |
| 0.19%                                       | 29651                                     |
| 0.24%                                       | 41280                                     |
| 0.47%                                       | 11348                                     |
| 0.03%                                       | 14729                                     |
| 0.20%                                       | 18541                                     |

CD314+ in Treg T cells day 1 PT

| Treg cells (FoxP3+ CD25+) CD314+<br>(FOP %) | SP CD8+ (TCRab+) T cells<br>(total count) |
|---------------------------------------------|-------------------------------------------|
| 0.19%                                       | 50850                                     |
| 0.32%                                       | 49735                                     |
| 0.19%                                       | 55643                                     |
| 0.16%                                       | 66470                                     |
| 0.30%                                       | 41467                                     |
| 0.35%                                       | 43287                                     |
| 0.35%                                       | 34972                                     |
| 0.15%                                       | 67737                                     |
| 0.11%                                       | 44827                                     |
| 0.33%                                       | 58851                                     |
| 0.36%                                       | 34724                                     |
| 0.38%                                       | 42191                                     |
| 0.26%                                       | 61550                                     |
| 0.13%                                       | 29461                                     |
| 0.12%                                       | 78655                                     |
| 0.20%                                       | 46442                                     |
| 0.04%                                       | 13516                                     |
| 0.16%                                       | 89168                                     |
| 0.57%                                       | 65687                                     |
| 0.51%                                       | 14683                                     |
| 0.21%                                       | 49017                                     |
| 0.14%                                       | 78025                                     |

CD314+ in Treg T cells day 25 PT



| SP CD8+ (TCRab+) T cells<br>(FOP %) | SP CD8+ (TCRab+) T cells CD25+ CD44+<br>(FOP %) |
|-------------------------------------|-------------------------------------------------|
| 28.20%                              | 43.70%                                          |
| 24.70%                              | 41.90%                                          |
| 25.00%                              | 44.40%                                          |
| 26.80%                              | 41.90%                                          |
| 23.20%                              | 44.20%                                          |
| 28.00%                              | 38.70%                                          |
| 25.00%                              | 40.50%                                          |
| 26.00%                              | 48.10%                                          |
| 27.40%                              | 45.30%                                          |
| 25.90%                              | 43.90%                                          |
| 25.60%                              | 50.40%                                          |
| 26.30%                              | 45.30%                                          |
| 20.30%                              | 45.00%                                          |
| 19.70%                              | 44.40%                                          |
| 25.70%                              | 43.50%                                          |
| 23.20%                              | 44.40%                                          |
| 25.50%                              | 46.70%                                          |
| 25.60%                              | 47.40%                                          |

CD8+ T cells in TCRab+ cells day 1 PT

CD25+ CD44+ in CD8+ T cells day 1 PT

| SP CD8+ (TCRab+) T cells<br>(FOP %) | SP CD8+ (TCRab+) T cells CD25+ CD44+<br>(FOP %) |
|-------------------------------------|-------------------------------------------------|
| 25.00%                              | 13.10%                                          |
| 24.70%                              | 13.40%                                          |
| 25.20%                              | 12.30%                                          |
| 24.00%                              | 15.10%                                          |
| 24.50%                              | 14.20%                                          |
| 24.30%                              | 14.20%                                          |
| 24.20%                              | 14.00%                                          |
| 25.00%                              | 14.90%                                          |
| 24.60%                              | 13.90%                                          |
| 23.30%                              | 13.90%                                          |
| 24.30%                              | 13.10%                                          |
| 24.50%                              | 14.00%                                          |
| 24.10%                              | 14.90%                                          |
| 24.70%                              | 14.30%                                          |
| 25.70%                              | 11.10%                                          |
| 24.40%                              | 14.00%                                          |
| 24.60%                              | 14.40%                                          |
| 25.70%                              | 9.44%                                           |
| 24.20%                              | 17.20%                                          |
| 22.30%                              | 14.90%                                          |
| 25.60%                              | 19.20%                                          |
| 25.70%                              | 20.40%                                          |

CD8+ T cells in TCRab+ cells day 25 PT

CD25+ CD44+ in CD8+ T cells day 25 PT

| SP CD8+ (TCRab+) T cells CD103+<br>(FOP %) | SP CD8+ (TCRab+) T cells CD218a+<br>(FOP %) |
|--------------------------------------------|---------------------------------------------|
| 51.00%                                     | 1.17%                                       |
| 48.20%                                     | 1.57%                                       |
| 38.30%                                     | 1.75%                                       |
| 42.70%                                     | 1.63%                                       |
| 35.30%                                     | 1.73%                                       |
| 47.40%                                     | 1.00%                                       |
| 41.40%                                     | 1.33%                                       |
| 38.90%                                     | 3.48%                                       |
| 49.40%                                     | 1.65%                                       |
| 50.40%                                     | 1.69%                                       |
| 37.20%                                     | 2.22%                                       |
| 38.00%                                     | 2.86%                                       |
| 34.70%                                     | 2.27%                                       |
| 34.60%                                     | 2.52%                                       |
| 37.60%                                     | 2.89%                                       |
| 37.80%                                     | 3.05%                                       |
| 36.70%                                     | 3.56%                                       |
| 35.90%                                     | 3.65%                                       |

CD103+ in CD8+ T cells day 1 PT

CD218a+ in CD8+ T cells day 1 PT

| SP CD8+ (TCRab+) T cells CD103+<br>(FOP %) | SP CD8+ (TCRab+) T cells CD218a+<br>(FOP %) |
|--------------------------------------------|---------------------------------------------|
| 22.70%                                     | 1.76%                                       |
| 23.90%                                     | 2.00%                                       |
| 21.90%                                     | 2.25%                                       |
| 19.80%                                     | 4.45%                                       |
| 23.30%                                     | 2.90%                                       |
| 22.70%                                     | 2.29%                                       |
| 24.40%                                     | 2.43%                                       |
| 22.00%                                     | 1.99%                                       |
| 26.00%                                     | 2.14%                                       |
| 21.30%                                     | 2.20%                                       |
| 22.80%                                     | 2.20%                                       |
| 22.50%                                     | 2.27%                                       |
| 20.80%                                     | 2.62%                                       |
| 24.60%                                     | 2.47%                                       |
| 21.30%                                     | 1.19%                                       |
| 21.20%                                     | 2.26%                                       |
| 23.60%                                     | 1.81%                                       |
| 23.80%                                     | 1.22%                                       |
| 22.70%                                     | 3.12%                                       |
| 21.10%                                     | 4.43%                                       |
| 28.70%                                     | 3.50%                                       |
| 22.80%                                     | 4.78%                                       |

CD103+ in CD8+ T cells day 25 PT

CD218a+ in CD8+ T cells day 25 PT

| SP CD8+ (TCRab+) T cells CD314+<br>(FOP %) | All TCR+ in dump-<br>(FOP %) | TCRab+ in all TCR+<br>(FOP %) |
|--------------------------------------------|------------------------------|-------------------------------|
| 0.11%                                      | 80.30%                       | 98.90%                        |
| 0.14%                                      | 75.70%                       | 99.00%                        |
| 0.13%                                      | 75.90%                       | 98.80%                        |
| 0.18%                                      | 80.90%                       | 99.30%                        |
| 0.20%                                      | 82.90%                       | 99.10%                        |
| 0.12%                                      | 83.70%                       | 99.20%                        |
| 0.10%                                      | 79.40%                       | 99.20%                        |
| 0.24%                                      | 79.00%                       | 99.10%                        |
| 0.22%                                      | 73.70%                       | 98.90%                        |
| 0.12%                                      | 76.10%                       | 99.00%                        |
| 0.20%                                      | 79.80%                       | 99.00%                        |
| 0.13%                                      | 78.70%                       | 99.10%                        |
| 0.24%                                      | 72.30%                       | 98.90%                        |
| 0.38%                                      | 72.20%                       | 98.80%                        |
| 0.41%                                      | 76.90%                       | 98.90%                        |
| 0.94%                                      | 75.10%                       | 98.80%                        |
| 0.24%                                      | 78.30%                       | 99.00%                        |
| 0.23%                                      | 80.50%                       | 99.10%                        |

CD314+ in CD8+ T cells day 1 PT

| SP CD8+ (TCRab+) T cells CD314+<br>(FOP %) | All TCR+ in dump-<br>(FOP %) | TCRab+ in all TCR+<br>(FOP %) |
|--------------------------------------------|------------------------------|-------------------------------|
| 0.38%                                      | 80.60%                       | 99.30%                        |
| 0.56%                                      | 74.70%                       | 99.20%                        |
| 0.44%                                      | 75.20%                       | 99.20%                        |
| 0.57%                                      | 71.10%                       | 99.10%                        |
| 0.55%                                      | 72.70%                       | 99.10%                        |
| 0.64%                                      | 76.10%                       | 99.20%                        |
| 0.66%                                      | 72.20%                       | 99.10%                        |
| 0.40%                                      | 76.30%                       | 99.30%                        |
| 0.40%                                      | 75.40%                       | 99.30%                        |
| 0.63%                                      | 73.50%                       | 99.20%                        |
| 0.61%                                      | 76.80%                       | 99.30%                        |
| 0.53%                                      | 76.10%                       | 99.20%                        |
| 0.64%                                      | 70.50%                       | 99.10%                        |
| 0.52%                                      | 77.50%                       | 99.20%                        |
| 0.34%                                      | 76.70%                       | 99.20%                        |
| 0.46%                                      | 76.70%                       | 99.30%                        |
| 0.33%                                      | 76.70%                       | 99.20%                        |
| 0.40%                                      | 70.80%                       | 99.20%                        |
| 0.79%                                      | 72.10%                       | 99.10%                        |
| 0.82%                                      | 67.20%                       | 99.00%                        |
| 0.46%                                      | 72.30%                       | 99.30%                        |
| 0.48%                                      | 72.00%                       | 99.20%                        |

CD314+ in CD8+ T cells day 25 PT

| TCRgd+ in all TCR+<br>(FOP %) | TCRgd+ T cells<br>(total count) | TCRgd+ T cells<br>(FOP %) |
|-------------------------------|---------------------------------|---------------------------|
| 0.93%                         | 737                             | 0.74%                     |
| 0.88%                         | 575                             | 0.67%                     |
| 1.07%                         | 2692                            | 0.81%                     |
| 0.63%                         | 2516                            | 0.51%                     |
| 0.68%                         | 366                             | 0.56%                     |
| 0.67%                         | 451                             | 0.56%                     |
| 0.74%                         | 376                             | 0.59%                     |
| 0.80%                         | 1549                            | 0.63%                     |
| 0.98%                         | 1288                            | 0.72%                     |
| 0.83%                         | 1042                            | 0.63%                     |
| 0.90%                         | 1858                            | 0.71%                     |
| 0.77%                         | 1014                            | 0.61%                     |
| 1.00%                         | 123                             | 0.73%                     |
| 1.05%                         | 1597                            | 0.76%                     |
| 0.96%                         | 1564                            | 0.74%                     |
| 1.05%                         | 519                             | 0.79%                     |
| 0.92%                         | 534                             | 0.72%                     |
| 0.80%                         | 589                             | 0.65%                     |

| TCRgd+ in all TCR+<br>(FOP %) | TCRgd+ T cells<br>(total count) | TCRgd+ T cells<br>(FOP %) |
|-------------------------------|---------------------------------|---------------------------|
| 0.59%                         | 1211                            | 0.48%                     |
| 0.69%                         | 1401                            | 0.52%                     |
| 0.70%                         | 1560                            | 0.53%                     |
| 0.81%                         | 2254                            | 0.57%                     |
| 0.74%                         | 1260                            | 0.54%                     |
| 0.67%                         | 1211                            | 0.51%                     |
| 0.78%                         | 1131                            | 0.56%                     |
| 0.63%                         | 1721                            | 0.48%                     |
| 0.62%                         | 1136                            | 0.47%                     |
| 0.71%                         | 1805                            | 0.52%                     |
| 0.65%                         | 933                             | 0.50%                     |
| 0.66%                         | 1140                            | 0.50%                     |
| 0.77%                         | 1976                            | 0.54%                     |
| 0.67%                         | 808                             | 0.52%                     |
| 0.63%                         | 1935                            | 0.48%                     |
| 0.64%                         | 1217                            | 0.49%                     |
| 0.65%                         | 362                             | 0.50%                     |
| 0.69%                         | 2408                            | 0.49%                     |
| 0.77%                         | 2131                            | 0.56%                     |
| 0.82%                         | 546                             | 0.55%                     |
| 0.64%                         | 1232                            | 0.46%                     |
| 0.71%                         | 2190                            | 0.52%                     |

| TCRgd+ T cells CD25+ CD44+<br>(FOP %) | TCRgd+ T cells CD103+<br>(FOP %) | TCRgd+ T cells CD218a+<br>(FOP %) |
|---------------------------------------|----------------------------------|-----------------------------------|
| 1.90%                                 | 30.70%                           | 5.43%                             |
| 2.96%                                 | 24.00%                           | 6.09%                             |
| 2.27%                                 | 24.90%                           | 9.18%                             |
| 3.86%                                 | 26.30%                           | 9.22%                             |
| 4.92%                                 | 22.70%                           | 12.00%                            |
| 2.00%                                 | 30.80%                           | 6.65%                             |
| 1.33%                                 | 26.60%                           | 5.05%                             |
| 2.32%                                 | 24.00%                           | 6.97%                             |
| 2.41%                                 | 26.20%                           | 6.99%                             |
| 2.69%                                 | 24.60%                           | 8.83%                             |
| 2.80%                                 | 25.20%                           | 9.42%                             |
| 2.07%                                 | 26.00%                           | 9.37%                             |
| 0.81%                                 | 23.60%                           | 2.44%                             |
| 1.75%                                 | 22.00%                           | 5.26%                             |
| 1.53%                                 | 22.90%                           | 6.20%                             |
| 1.93%                                 | 24.50%                           | 5.97%                             |
| 1.87%                                 | 25.30%                           | 6.74%                             |
| 1.36%                                 | 25.60%                           | 6.96%                             |

| TCRgd+ T cells CD25+ CD44+<br>(FOP %) | TCRgd+ T cells CD103+<br>(FOP %) | TCRgd+ T cells CD218a+<br>(FOP %) |
|---------------------------------------|----------------------------------|-----------------------------------|
| 2.15%                                 | 15.80%                           | 10.20%                            |
| 2.07%                                 | 16.60%                           | 8.64%                             |
| 2.82%                                 | 16.90%                           | 10.20%                            |
| 2.00%                                 | 15.50%                           | 12.10%                            |
| 2.06%                                 | 14.80%                           | 10.20%                            |
| 1.49%                                 | 16.40%                           | 9.50%                             |
| 2.83%                                 | 16.90%                           | 9.64%                             |
| 2.27%                                 | 15.10%                           | 9.24%                             |
| 2.64%                                 | 17.30%                           | 9.42%                             |
| 2.60%                                 | 16.00%                           | 9.31%                             |
| 2.04%                                 | 18.10%                           | 9.65%                             |
| 2.28%                                 | 15.00%                           | 7.63%                             |
| 2.18%                                 | 13.40%                           | 9.36%                             |
| 2.85%                                 | 16.00%                           | 10.80%                            |
| 2.27%                                 | 14.50%                           | 8.32%                             |
| 1.73%                                 | 15.90%                           | 9.53%                             |
| 2.21%                                 | 14.60%                           | 11.60%                            |
| 2.41%                                 | 15.60%                           | 9.39%                             |
| 2.21%                                 | 15.30%                           | 11.30%                            |
| 3.30%                                 | 16.50%                           | 11.20%                            |
| 4.63%                                 | 20.40%                           | 12.70%                            |
| 2.74%                                 | 13.90%                           | 13.20%                            |

| TCRgd+ T cells CD314+<br>(FOP %) | TCR- cells<br>(total count) | TCR- cells<br>(FOP %) | TCR- cells IL18-Ra+<br>(FOP %) |
|----------------------------------|-----------------------------|-----------------------|--------------------------------|
| 2.04%                            | 19083                       | 19.30%                | 2.41%                          |
| 2.09%                            | 20582                       | 23.80%                | 2.34%                          |
| 2.12%                            | 78397                       | 23.70%                | 1.89%                          |
| 2.70%                            | 92804                       | 18.70%                | 2.53%                          |
| 3.55%                            | 10864                       | 16.70%                | 2.59%                          |
| 1.55%                            | 12844                       | 15.90%                | 1.83%                          |
| 1.33%                            | 13004                       | 20.30%                | 1.48%                          |
| 2.45%                            | 50914                       | 20.70%                | 1.55%                          |
| 2.33%                            | 46069                       | 25.90%                | 2.39%                          |
| 2.11%                            | 39074                       | 23.60%                | 1.86%                          |
| 2.10%                            | 51752                       | 19.90%                | 2.13%                          |
| 2.17%                            | 34991                       | 21.00%                | 2.54%                          |
| 0.81%                            | 4600                        | 27.20%                | 1.48%                          |
| 3.19%                            | 57800                       | 27.40%                | 1.50%                          |
| 2.88%                            | 48124                       | 22.80%                | 1.84%                          |
| 3.08%                            | 16111                       | 24.40%                | 1.56%                          |
| 3.75%                            | 15923                       | 21.40%                | 1.77%                          |
| 3.23%                            | 17522                       | 19.30%                | 2.00%                          |

| TCRgd+ T cells CD314+<br>(FOP %) | TCR- cells<br>(total count) | TCR- cells<br>(FOP %) | TCR- cells IL18-Ra+<br>(FOP %) |
|----------------------------------|-----------------------------|-----------------------|--------------------------------|
| 7.27%                            | 47868                       | 18.90%                | 1.81%                          |
| 6.00%                            | 67215                       | 24.80%                | 1.45%                          |
| 5.00%                            | 72075                       | 24.40%                | 1.37%                          |
| 7.05%                            | 112145                      | 28.50%                | 1.37%                          |
| 5.79%                            | 62842                       | 26.70%                | 1.48%                          |
| 5.53%                            | 55430                       | 23.40%                | 1.58%                          |
| 6.54%                            | 55044                       | 27.30%                | 1.51%                          |
| 4.71%                            | 83118                       | 23.20%                | 1.30%                          |
| 3.96%                            | 58983                       | 24.20%                | 1.42%                          |
| 5.93%                            | 90031                       | 26.00%                | 1.47%                          |
| 6.32%                            | 42467                       | 22.60%                | 1.63%                          |
| 4.65%                            | 53366                       | 23.40%                | 1.45%                          |
| 6.02%                            | 106100                      | 29.00%                | 1.31%                          |
| 6.81%                            | 34152                       | 22.00%                | 1.65%                          |
| 4.19%                            | 91186                       | 22.70%                | 1.30%                          |
| 6.08%                            | 56978                       | 22.80%                | 1.45%                          |
| 7.18%                            | 16513                       | 22.90%                | 2.08%                          |
| 4.69%                            | 141387                      | 28.60%                | 1.24%                          |
| 6.52%                            | 103888                      | 27.30%                | 1.35%                          |
| 6.59%                            | 31740                       | 32.00%                | 1.50%                          |
| 8.04%                            | 72992                       | 27.30%                | 1.44%                          |
| 7.12%                            | 116580                      | 27.40%                | 1.71%                          |

| TCR- cells IL18-Ra+ CD25+ CD44+ | TCR- cells IL18-Ra+ CD103+ |
|---------------------------------|----------------------------|
| (FOP %)                         | (FOP %)                    |
| 9.13%                           | 2.61%                      |
| 16.80%                          | 6.44%                      |
| 20.60%                          | 2.97%                      |
| 11.60%                          | 2.94%                      |
| 13.20%                          | 4.63%                      |
| 10.60%                          | 2.98%                      |
| 10.90%                          | 3.11%                      |
| 8.85%                           | 2.02%                      |
| 11.30%                          | 3.45%                      |
| 20.70%                          | 5.10%                      |
| 18.20%                          | 2.72%                      |
| 17.10%                          | 4.72%                      |
| 10.30%                          | 4.41%                      |
| 13.40%                          | 2.88%                      |
| 10.70%                          | 2.83%                      |
| 9.96%                           | 2.79%                      |
| 13.10%                          | 3.19%                      |
| 11.10%                          | 3.42%                      |

| TCR- cells IL18-Ra+ CD25+ CD44+ | TCR- cells IL18-Ra+ CD103+ |
|---------------------------------|----------------------------|
| (FOP %)                         | (FOP %)                    |
| 22.70%                          | 1.96%                      |
| 25.40%                          | 3.50%                      |
| 27.10%                          | 4.76%                      |
| 25.50%                          | 2.08%                      |
| 26.20%                          | 3.34%                      |
| 26.00%                          | 3.55%                      |
| 26.80%                          | 3.12%                      |
| 24.10%                          | 3.24%                      |
| 29.20%                          | 2.87%                      |
| 25.30%                          | 3.18%                      |
| 25.30%                          | 2.89%                      |
| 24.80%                          | 2.58%                      |
| 26.40%                          | 2.01%                      |
| 25.80%                          | 3.37%                      |
| 26.20%                          | 4.23%                      |
| 27.60%                          | 3.03%                      |
| 20.60%                          | 1.74%                      |
| 22.10%                          | 3.32%                      |
| 26.20%                          | 3.20%                      |
| 25.30%                          | 2.32%                      |
| 22.80%                          | 2.18%                      |
| 24.50%                          | 2.86%                      |

| TCR- cells IL18-Ra+ CD314+<br>(FOP %) | TCR- cells CD314+<br>(FOP %) | TCR- cells CD314+ CD25+ CD44+<br>(FOP %) |
|---------------------------------------|------------------------------|------------------------------------------|
| 28.00%                                | 1.84%                        | 5.11%                                    |
| 46.40%                                | 2.36%                        | 6.38%                                    |
| 31.20%                                | 1.41%                        | 5.60%                                    |
| 34.10%                                | 1.97%                        | 3.98%                                    |
| 33.50%                                | 2.14%                        | 4.72%                                    |
| 38.30%                                | 1.47%                        | 3.70%                                    |
| 36.80%                                | 1.35%                        | 2.84%                                    |
| 33.90%                                | 1.40%                        | 5.75%                                    |
| 30.00%                                | 1.83%                        | 3.80%                                    |
| 32.40%                                | 1.38%                        | 5.58%                                    |
| 35.00%                                | 1.74%                        | 6.10%                                    |
| 35.40%                                | 1.91%                        | 5.08%                                    |
| 38.20%                                | 1.57%                        | 4.17%                                    |
| 40.70%                                | 1.61%                        | 6.47%                                    |
| 35.20%                                | 1.78%                        | 9.22%                                    |
| 34.30%                                | 1.84%                        | 8.78%                                    |
| 34.80%                                | 1.63%                        | 8.08%                                    |
| 27.90%                                | 1.60%                        | 6.76%                                    |

| TCR- cells IL18-Ra+ CD314+<br>(FOP %) | TCR- cells CD314+<br>(FOP %) | TCR- cells CD314+ CD25+ CD44+<br>(FOP %) |
|---------------------------------------|------------------------------|------------------------------------------|
| 51.00%                                | 2.03%                        | 16.70%                                   |
| 51.60%                                | 2.33%                        | 14.90%                                   |
| 48.30%                                | 1.81%                        | 14.20%                                   |
| 58.70%                                | 1.74%                        | 18.20%                                   |
| 51.30%                                | 2.04%                        | 16.60%                                   |
| 50.10%                                | 2.41%                        | 14.10%                                   |
| 53.10%                                | 2.25%                        | 14.80%                                   |
| 45.90%                                | 1.62%                        | 12.90%                                   |
| 49.30%                                | 1.61%                        | 19.70%                                   |
| 50.20%                                | 1.96%                        | 15.20%                                   |
| 49.50%                                | 2.43%                        | 14.10%                                   |
| 52.50%                                | 2.14%                        | 14.10%                                   |
| 52.40%                                | 1.85%                        | 17.00%                                   |
| 50.10%                                | 2.16%                        | 15.40%                                   |
| 43.70%                                | 1.60%                        | 14.60%                                   |
| 48.80%                                | 1.85%                        | 14.50%                                   |
| 47.70%                                | 2.07%                        | 12.30%                                   |
| 43.80%                                | 1.65%                        | 12.30%                                   |
| 51.10%                                | 2.43%                        | 11.90%                                   |
| 61.10%                                | 2.17%                        | 18.90%                                   |
| 51.00%                                | 1.72%                        | 19.90%                                   |
| 48.80%                                | 1.75%                        | 19.70%                                   |



| TCR- cells CD314+ CD103+<br>(FOP %) | TCR- cells CD314+ CD218a+<br>(FOP %) |
|-------------------------------------|--------------------------------------|
| 3.69%                               | 80.10%                               |
| 7.82%                               | 72.60%                               |
| 3.61%                               | 76.40%                               |
| 2.67%                               | 83.00%                               |
| 6.44%                               | 77.30%                               |
| 2.65%                               | 79.90%                               |
| 7.95%                               | 71.60%                               |
| 3.51%                               | 71.20%                               |
| 3.21%                               | 84.60%                               |
| 3.90%                               | 78.40%                               |
| 3.33%                               | 75.50%                               |
| 4.78%                               | 84.30%                               |
| 2.78%                               | 69.40%                               |
| 4.09%                               | 65.90%                               |
| 4.32%                               | 69.00%                               |
| 5.41%                               | 54.70%                               |
| 7.31%                               | 73.10%                               |
| 2.85%                               | 75.40%                               |

| TCR- cells CD314+ CD103+<br>(FOP %) | TCR- cells CD314+ CD218a+<br>(FOP %) |
|-------------------------------------|--------------------------------------|
| 1.85%                               | 53.80%                               |
| 0.25%                               | 38.40%                               |
| 0.61%                               | 44.50%                               |
| 0.31%                               | 52.70%                               |
| 0.39%                               | 43.90%                               |
| 0.67%                               | 39.40%                               |
| 0.56%                               | 41.50%                               |
| 0.07%                               | 44.80%                               |
| 0.42%                               | 54.10%                               |
| 0.96%                               | 45.50%                               |
| 0.48%                               | 41.00%                               |
| 0.53%                               | 41.80%                               |
| 0.31%                               | 44.50%                               |
| 1.08%                               | 45.40%                               |
| 0.34%                               | 44.70%                               |
| 0.38%                               | 46.20%                               |
| 0.88%                               | 58.10%                               |
| 0.21%                               | 41.30%                               |
| 0.63%                               | 33.40%                               |
| 0.29%                               | 46.10%                               |
| 0.79%                               | 53.10%                               |
| 0.24%                               | 58.10%                               |

| TCR- cells CD314+ and CD218a+<br>(FOP %) | TCR- cells CD314+ and CD218a+ CD25+ CD44+<br>(FOP %) |
|------------------------------------------|------------------------------------------------------|
| 1.47%                                    | 5.00%                                                |
| 1.71%                                    | 6.82%                                                |
| 1.07%                                    | 5.84%                                                |
| 1.63%                                    | 3.77%                                                |
| 1.62%                                    | 3.41%                                                |
| 1.16%                                    | 4.70%                                                |
| 0.97%                                    | 3.17%                                                |
| 0.99%                                    | 3.75%                                                |
| 1.53%                                    | 3.54%                                                |
| 1.07%                                    | 5.00%                                                |
| 1.31%                                    | 6.07%                                                |
| 1.61%                                    | 5.15%                                                |
| 1.09%                                    | 4.00%                                                |
| 1.05%                                    | 4.60%                                                |
| 1.22%                                    | 5.63%                                                |
| 1.00%                                    | 4.97%                                                |
| 1.18%                                    | 7.98%                                                |
| 1.19%                                    | 4.31%                                                |

| TCR- cells CD314+ and CD218a+<br>(FOP %) | TCR- cells CD314+ and CD218a+ CD25+ CD44+<br>(FOP %) |
|------------------------------------------|------------------------------------------------------|
| 1.07%                                    | 26.40%                                               |
| 0.87%                                    | 30.40%                                               |
| 0.77%                                    | 26.70%                                               |
| 0.90%                                    | 29.20%                                               |
| 0.87%                                    | 28.40%                                               |
| 0.93%                                    | 28.80%                                               |
| 0.91%                                    | 30.10%                                               |
| 0.70%                                    | 23.30%                                               |
| 0.84%                                    | 30.20%                                               |
| 0.87%                                    | 28.10%                                               |
| 0.96%                                    | 26.80%                                               |
| 0.86%                                    | 27.60%                                               |
| 0.81%                                    | 31.40%                                               |
| 0.96%                                    | 26.80%                                               |
| 0.69%                                    | 26.80%                                               |
| 0.84%                                    | 25.40%                                               |
| 1.16%                                    | 18.80%                                               |
| 0.66%                                    | 24.40%                                               |
| 0.79%                                    | 26.90%                                               |
| 0.99%                                    | 34.30%                                               |
| 0.89%                                    | 33.30%                                               |
| 0.99%                                    | 29.00%                                               |

| TCR- cells CD314+ and CD218a+ CD103+<br>(FOP %) |       |
|-------------------------------------------------|-------|
|                                                 | 2.50% |
|                                                 | 4.55% |
|                                                 | 2.38% |
|                                                 | 1.45% |
|                                                 | 3.98% |
|                                                 | 2.01% |
|                                                 | 2.38% |
|                                                 | 1.19% |
|                                                 | 2.27% |
|                                                 | 1.43% |
|                                                 | 1.48% |
|                                                 | 4.09% |
|                                                 | 4.00% |
|                                                 | 2.63% |
|                                                 | 1.54% |
|                                                 | 1.24% |
|                                                 | 2.13% |
|                                                 | 1.91% |

| TCR- cells CD314+ and CD218a+ CD103+<br>(FOP %) |       |
|-------------------------------------------------|-------|
|                                                 | 0.20% |
|                                                 | 0.17% |
|                                                 | 0.72% |
|                                                 | 0.10% |
|                                                 | 0.18% |
|                                                 | 0.19% |
|                                                 | 0.20% |
|                                                 | 0.00% |
|                                                 | 0.00% |
|                                                 | 0.39% |
|                                                 | 0.00% |
|                                                 | 0.43% |
|                                                 | 0.23% |
|                                                 | 0.00% |
|                                                 | 0.32% |
|                                                 | 0.00% |
|                                                 | 0.52% |
|                                                 | 0.11% |
|                                                 | 0.36% |
|                                                 | 0.00% |
|                                                 | 0.15% |
|                                                 | 0.09% |
